# Supplementary material for: Distinct Docking Mechanisms Mediate Interactions between the Msg5 Phosphatase and Mating or Cell Integrity Mitogen-activated Protein Kinases (MAPKs) in Saccharomyces cerevisiae
Source: PubMed Central journal article supplement — J Biol Chem. 2011 Oct 17;286(49):42037–50. doi: 10.1074/jbc.M111.286948 (PMC3234975; doi:10.1074/jbc.m111.286948), 2011-10-17

MS ID#: JBC/2011/234955

MS TITLE: Distinct docking mechanisms mediate interactions between Msg5 phosphatase and mating or cell integrity MAPKs in *S. cerevisiae*

**Supplemental Table I.** Oligonucleotides used for amplifying DNA fragments by PCR:

| Plasmid                                              | Sense oligonucleotide                               | Antisense oligonucleotide                             |
|------------------------------------------------------|-----------------------------------------------------|-------------------------------------------------------|
| pGBKT7-MSG5                                          | 5'GGAATTCATATGATGCAATTTCACT<br>CAGATAAGC 3'         | 5'CCGCTCGAGTTAAGGAAGAAACATC<br>ATCTG 3'               |
| pGBKT7-Msg5 <sup>1-245</sup>                         | 5'GGAATTCATATGATGCAATTTCACT<br>CAGATAAGC 3'         | 5'CCGCTCGAGATATAGATACAAATTAG<br>GCGGC 3'              |
| pGBKT7-Msg5 <sup>246-489</sup>                       | 5'GGATTCCATATGTATTCAGAACCCAA<br>ACTAGAAG 3'         | 5'CCGCTCGAGTTAAGGAAGAAACATC<br>ATCTG 3'               |
| pGBKT7-Msg5 <sup>124-489</sup>                       | 5'GGAATTCATATGACAGTATCGTCTA<br>TCAGTAAG 3'          | 5'CCGCTCGAGTTAAGGAAGAAACATC<br>ATCTG 3'               |
| pGBKT7-Msg5 <sup>1-123</sup>                         | 5'GGAATTCATATGATGCAATTTCACT<br>CAGATAAGC 3'         | 5'CCGCTCGAGGGATGATTTTGTATACA<br>CGTTGG 3'             |
| pGBKT7-Msg5 <sup>90-489</sup>                        | 5'GGATTCCATATGCCACCATCGCTGTC<br>GATGAGG 3'          | 5'CCGCTCGAGTTAAGGAAGAAACATC<br>ATCTG 3'               |
| pGBKT7-Msg5 <sup>1-45</sup>                          | 5'GGAATTCATATGATGCAATTTCACT<br>CAGATAAGC 3'         | 5'CCGCTCGAGTAATGGATGGAGTGCTG<br>CTATATC 3'            |
| pGBKT7-Msg5 <sup>46-489</sup>                        | 5'GGAATTCATATGGAATTCTCATCGC<br>CAAGC 3'             | 5'CCGCTCGAGTTAAGGAAGAAACATC<br>ATCTG 3'               |
| pGADT7-Kss1                                          | 5'GGAATTCATATGGCTAGAACCATAA<br>CTTTTGTAT 3'         | 5'CCGCTCGAGCTATTCCATGGTCTTCA<br>TTAGTTC 3';           |
| pGADT7-Fus3                                          | 5'GGAATTCATATGCCAAAGAGAATTG<br>TATACAAT 3'          | 5'CGCGGATCCCTAACTAAATATTTTCGT<br>TCCAAATGAG 3'        |
| pGADT7-Smk1                                          | 5'GGAATTCATATGAATTGCACACTTA<br>CAGATAAT 3'          | 5'CCGCTCGAGCTATAAAGACGAGGAG<br>GACAATCGGT 3'          |
| pGADT7-Slt2                                          | 5'GGAATTCATATGGCTGATAAGATAG<br>AGAGGCAT 3'          | 5'CCGCTCGAGCTAAAAATATTTTCTAT<br>CTAATCC 3'            |
| pGADT7-Mlp1                                          | 5'GGAATTCATATGGCGACTGACACCG<br>AGAGGTGT 3'          | 5'CCGCTCGAGTTAGTTAACACCCTGAA<br>ATGAATTAG 3'          |
| pGADT7-Hog1                                          | 5'GGAATTCATATGACCACTAACGAGG<br>AATTCATTAGG 3'       | 5'CCGCTCGAGTCATTTGCAGCTACATG<br>ATCGCTG 3'            |
| pEG(KG)-Slt2 <sup>274-373</sup>                      | 5'CCCCCGGGATCCTTCATCCAAAAG<br>TACC 3'               | 5'CCCCCGGGATCCCTAAAAATATTTT<br>CTATC 3'               |
| pET15B- Slt2-His                                     | 5'ACGCGTCGACTTCATATGATGGCTGA<br>TAAGATAGAGAG 3'     | 5'TCGCGTCGACCTCGAGCTAAAAATAT<br>TTTCTATCTAATCCAAAC 3' |
| pET15B- Slt2 <sup>1-273</sup> -His                   | 5'ACGCGTCGACTTCATATGATGGCTGA<br>TAAGATAGAGAG 3'     | 5'TCGCGTCGACCTCGAGCTAACCTAAT<br>TGATGTATGTAGTCC 3'    |
| pET15B- Slt2 <sup>1-373</sup> -His                   | 5'ACGCGTCGACTTCATATGATGGCTGA<br>TAAGATAGAGAG 3'     | 5'TCGCGTCGACCTCGAGCTATAATTGC<br>CTTTGCTCTTCTAATAG3'   |
| pET15B- Slt2 <sup>274-373</sup> -His                 | 5'ACGCGTCGACCCCATATGTTCAATCC<br>AAAAGTACCTTTTGTG 3' | 5'TCGCGTCGACCTCGAGCTATAATTGC<br>CTTTGCTCTTCTAATAG 3'  |
| pET15B- Slt2 <sup>274-373(323N,326N,327N)</sup> -His | 5'ACGCGTCGACCCCATATGTTCAATCC<br>AAAAGTACCTTTTGTG 3' | 5'TCGCGTCGACCTCGAGCTATAATTGC<br>CTTTGCTCTTCTAATAG 3'  |
| pET15B- Mlp1 <sup>274-373</sup> -His                 | 5'ACGCGTCGACCCCATATGAATATCCC<br>GGGAAGATCGTTTG 3'   | 5'TCGCGTCGACCTCGAGTTATGATGGG<br>GAATCACCGC 3'         |
| pET15B- Mlp1 <sup>274-373(326N)</sup> -His           | 5'ACGCGTCGACCCCATATGAATATCCC<br>GGGAAGATCGTTTG 3'   | 5'TCGCGTCGACCTCGAGTTATGATGGG<br>GAATCACCGC 3'         |

**Supplemental Table II:** Oligonucleotides used for directed mutagenesis by PCR:

| Plasmid                         | Sense oligonucleotide*                                             | Antisense oligonucleotide*                           |
|---------------------------------|--------------------------------------------------------------------|------------------------------------------------------|
| pGBKT7-Msg5 <sup>MD1</sup>      | 5'tccttaca <sup>aa</sup> atGCgaataccGCaaatGCatctGCagatatagcagca 3' | 5'tgctgtatatctGCagatGCatttGCggtattcGCattttgaagga 3'  |
| pGBKT7-Msg5 <sup>MD2</sup>      | 5'tcgctctcgatgGCCGCCagcgaggcctct 3'                                | 5'agaggcctcgcctGGCGGCcategacagcga 3'                 |
| pGADT7-Kss1 <sup>CD</sup>       | 5'catgacccaagtAatgagccggaatat 3'                                   | 5'atattccggctcatTacttgggtcatg 3'                     |
| pGADT7-Fus3 <sup>CD</sup>       | 5'cacgatccaatAacgaacctgaagge 3'                                    | 5'-gccttcaggctcgtTatttggatcgtg 3'                    |
| pGADT7-Slt2 <sup>CD</sup>       | 5'tggcatgatccagctAacgaacttgtgtg 3'                                 | 5'acacacaggtcgtTagctggatcatgcca 3'                   |
| pGADT7-Slt2 <sup>CD3</sup>      | 5'tgtctatatggcatAatccagctAacAaTcctgtgtgtagtga 3'                   | 5'ttactacacacaggAtTgtTagctggatTatgcatatagaca 3'      |
| pGADT7-Mlp1 <sup>CD</sup>       | 5'tgtggcatAatataAatgaggaattctcatg 3'                               | 5'cctcatTtatatTatgccacattgacaaatgg 3'                |
| YCplac22MSG5 <sup>MD1</sup>     | 5'ggaataca <sup>aa</sup> atGCatctGCagatatagcagcactccatcc 3'        | 5'ggatggagtgcTtatctGCagatgcattttggtatcc 3'           |
| YCplac22MSG5 <sup>MD2</sup>     | 5'ccaccatcgtgtcgatgGCGGCaagcgaggectc 3'                            | 5'gaggcctcgttGCCGCcatcgacagcgatggtgg 3'              |
| YCplac22MSG5 <sup>MD3</sup>     | 5'agcgaggcctctGCaGCTGcactaccacatctttgaagaaccgaactg 3'              | 5'agatgttgtagtgCAGCtGCagaggcctcgttcgcctcatcgacagc 3' |
| YCplac111-Slt2 <sup>1-373</sup> | 5'gctattagaagacc <sup>aa</sup> aggcaattaTGATGAcagcagcaacagcagc 3'  | 5'gctgctgttgcctgctgTCATCAtaattgccttggcttctaagc 3'    |
| pGBKT7-Msg5 <sup>MD3</sup>      | 5'agcgaggcctctGCaGCTGcactaccacatctttgaagaaccgaactg 3'              | 5'agatgttgtagtgCAGCtGCagaggcctcgttcgcctcatcgacagc 3' |

\* Nucleotide changes are indicated in upper case

## Supplemental Figure Legends

**FIGURE S1: Expression of hybrid proteins used in the two-hybrid assays.** *A*, western blot analysis showing expression of fusion proteins of each of the MAPKs or the indicated mutant versions to the Gal4 activation domain. *B*, western blot analysis showing expression of fusion proteins of Msg5 or the indicated Msg5 fragments or mutated versions to the Gal4 DNA-binding domain. PJ69-4A and PJ69-4 $\alpha$  cells were transformed with pGADT7 or pGBKT7-derived plasmids and the amount of the respective proteins in whole extracts monitored using an anti-HA antibody in *A*, or an antibody against the Gal4p DNA-binding domain (anti-Gal4BD) in *B*. Actin (as a loading control) was immunodetected by using anti-actin antibodies. Reproducible results were obtained in different experiments and selected images correspond to representative blots.

**FIGURE S2: Expression analysis of CWI-regulated genes.** Analysis by real time Q-RT-PCR of the expression level of the indicated genes in the *msg5 $\Delta$*  DD1–2D mutant strain transformed with the vector YCplac22m, or plasmids YCplac22MSG5m (Msg5) or YCplac22MSG5<sup>MD3</sup> (Msg5<sup>MD3</sup>). The expression of *YGR189C* (*CRH1*), *YGR032W* (*FKS2*), *YKL161C* (*MLP1*), and *YKL163W* (*PIR3*) genes was determined in the absence or the presence of Congo red (30 $\mu$ g/ml). The results are expressed as the ratios of the values from the different strains or conditions versus values from untreated *msg5 $\Delta$*  cells transformed with YCplac22MSG5m. Each cDNA was assayed in at least duplicate PCR reactions. Results are the mean from three different transformants. Error bars represent standard deviation.

FIG. S1

**A**

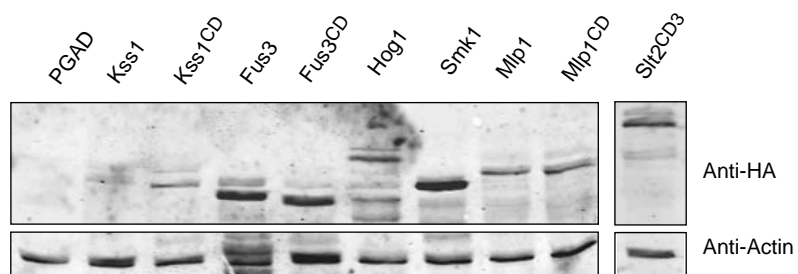

**B**

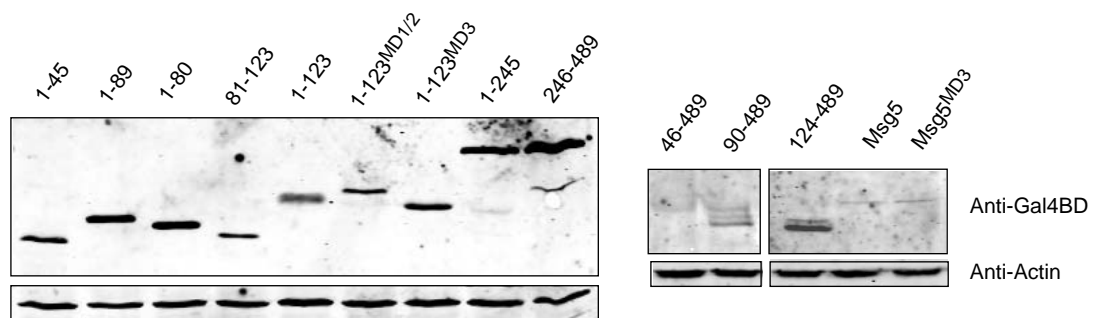

FIG. S2

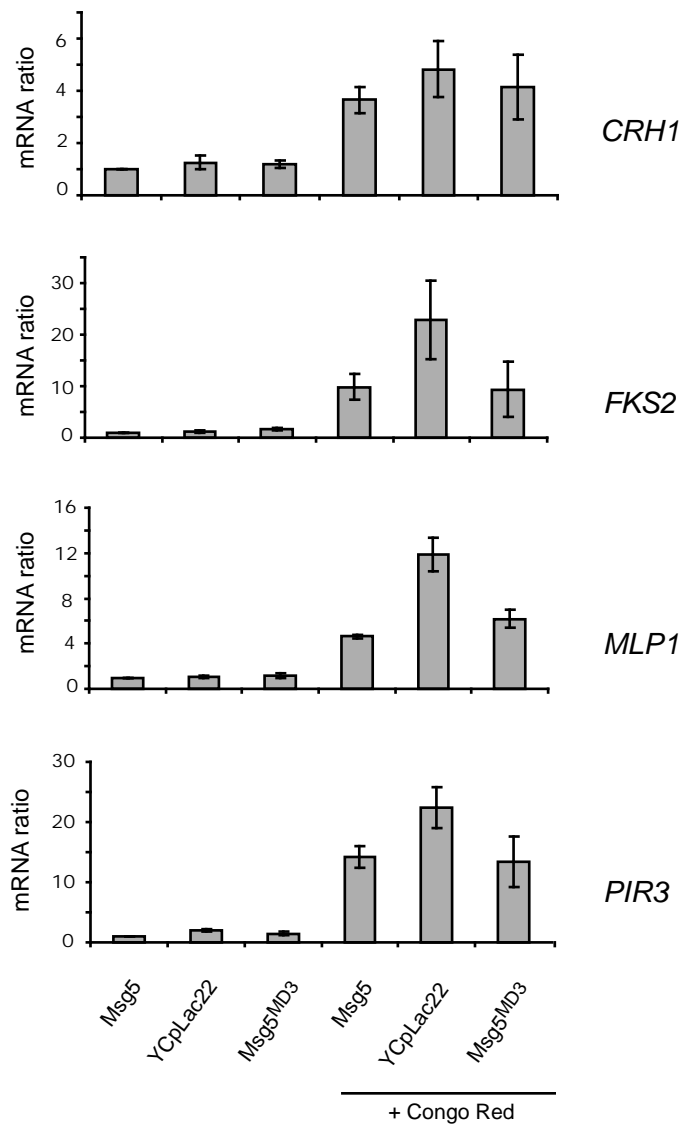

Supplement: supp_M111.286948_jbc.M111.286948-1.pdf [file supp_M111.286948_jbc.M111.286948-1.pdf]
